# Supplementary material
Source: PubMed Central journal article supplement (PMC4865563)
Supplement: jcsm.12.5.757s1.pdf [file jcsm.12.5.757s1.pdf]

## Literature Search String

((adaptive[All Fields] AND servo[All Fields] AND ("ventilation"[MeSH Terms] OR "ventilation"[All Fields] OR "respiration"[MeSH Terms] OR "respiration"[All Fields])) OR ASV[All Fields]) AND ("sleep apnoea syndromes"[All Fields] OR "sleep apnea syndromes"[MeSH Terms] OR ("sleep"[All Fields] AND "apnea"[All Fields] AND "syndromes"[All Fields]) OR "sleep apnea syndromes"[All Fields]) AND (("2010/06/01"[PDAT] : "2015/10/31"[PDAT]) AND "humans"[MeSH Terms] AND English[lang] AND "adult"[MeSH Terms])

**Table S1** – Summary of findings for ASV

### ASV for CSAS in CHF patients

**References:** Artz 2008 (A); Artz 2013 (B); Campbell 2012 (C); Carnevale 2011 (D); Cowie 2015 (E); Fietze 2008(F); Joho 2012 (G); Kasai 2010(H); Kasai 2013 (I); Kourouklis 2013 (J); Koyama 2010 (K); Koyama 2013 (L); Miyata 2012 (M); Oldenburg 2008(N); Oldenburg 2011 (O); Oldenburg 2013 (P); Owada 2013 (Q); Pepperell 2003(R); Philippe 2006(S); Randerath 2012 (T); Suzuki 2014 (U); Szollosi 2006(V); Yoshihisa 2011 (W); Yoshihisa 2012 (X); Yoshihisa 2013 EJHF (Y); Yoshihisa 2013 Heart (A); Zhang 2006 (AA)

| Outcomes                                                                                                                   | Quality of the evidence (GRADE)   | Absolute Effect<br>ASV (Pre-Post treatment) <sup>1</sup>                         | No of Participants (studies)                                                       |
|----------------------------------------------------------------------------------------------------------------------------|-----------------------------------|----------------------------------------------------------------------------------|------------------------------------------------------------------------------------|
| <b>Left Ventricular Ejection Fraction</b><br>(follow-up 0.5-6 months; measured with: %; Better indicated by higher values) | ⊕⊕⊕⊖<br><b>low</b> <sup>2,3</sup> | The LVEF in the ASV group was <b>5.49% higher</b><br>(4.16% to 6.82% higher)     | 426<br>(17 studies) <sup>B,D,F-I,M-O,P-U,W,Y,AA</sup>                              |
| <b>Apnea-Hypopnea Index</b><br>(follow-up 0.005 - 6 months; measured with: No./hr sleep; Better indicated by lower values) | ⊕⊕⊕⊖<br><b>low</b> <sup>2,3</sup> | The AHI in the ASV group was <b>30.63 events lower</b><br>(26.98 to 34.28 lower) | 638<br>(27 studies) <sup>A-D,F-AA</sup>                                            |
|                                                                                                                            |                                   | Relative Effect                                                                  |                                                                                    |
|                                                                                                                            |                                   | Baseline Risk                                                                    | Comparative Risk                                                                   |
| <b>Mortality (Cardiac Death)</b><br>(follow-up 12-31 months; measured with: events; Better indicated by lower RR)          | ⊕⊕⊕⊕<br><b>high</b>               | 198 per 1,000 patients                                                           | <b>247</b> per 1,000 patients<br>(202 to 304)<br><br><b>RR 1.25</b> (1.02 to 1.53) |
|                                                                                                                            |                                   |                                                                                  | 1325<br>(1 study) <sup>F</sup>                                                     |

<sup>1</sup> Results vs. baseline; patients served as their own controls

<sup>2</sup> Combination of randomized and non-randomized studies

<sup>3</sup> Studies generally funded by industry

**Figure S1 - Meta-analysis of LVEF from before-after ASV treatment trials**

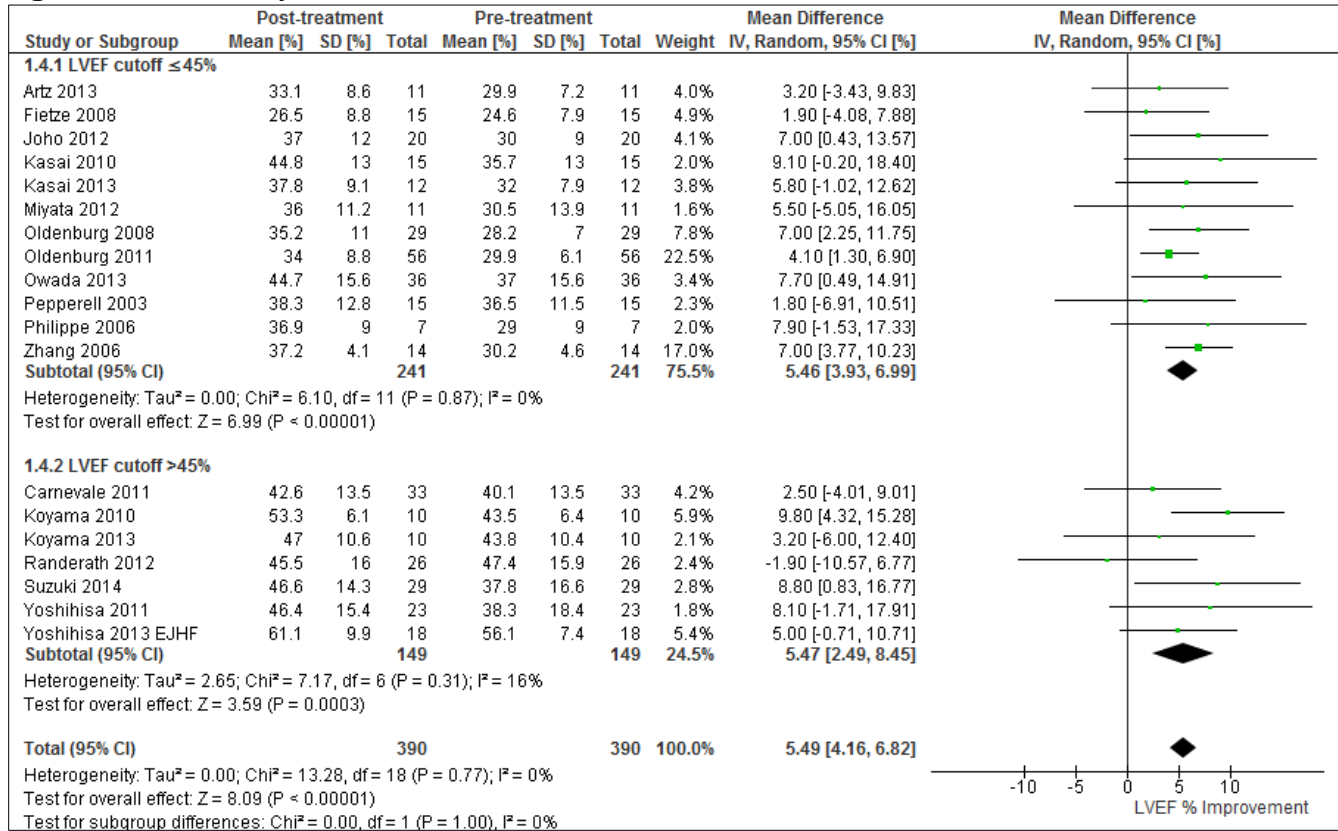

**Figure S2 – Meta-analysis of AHI from before-after ASV treatment trials**

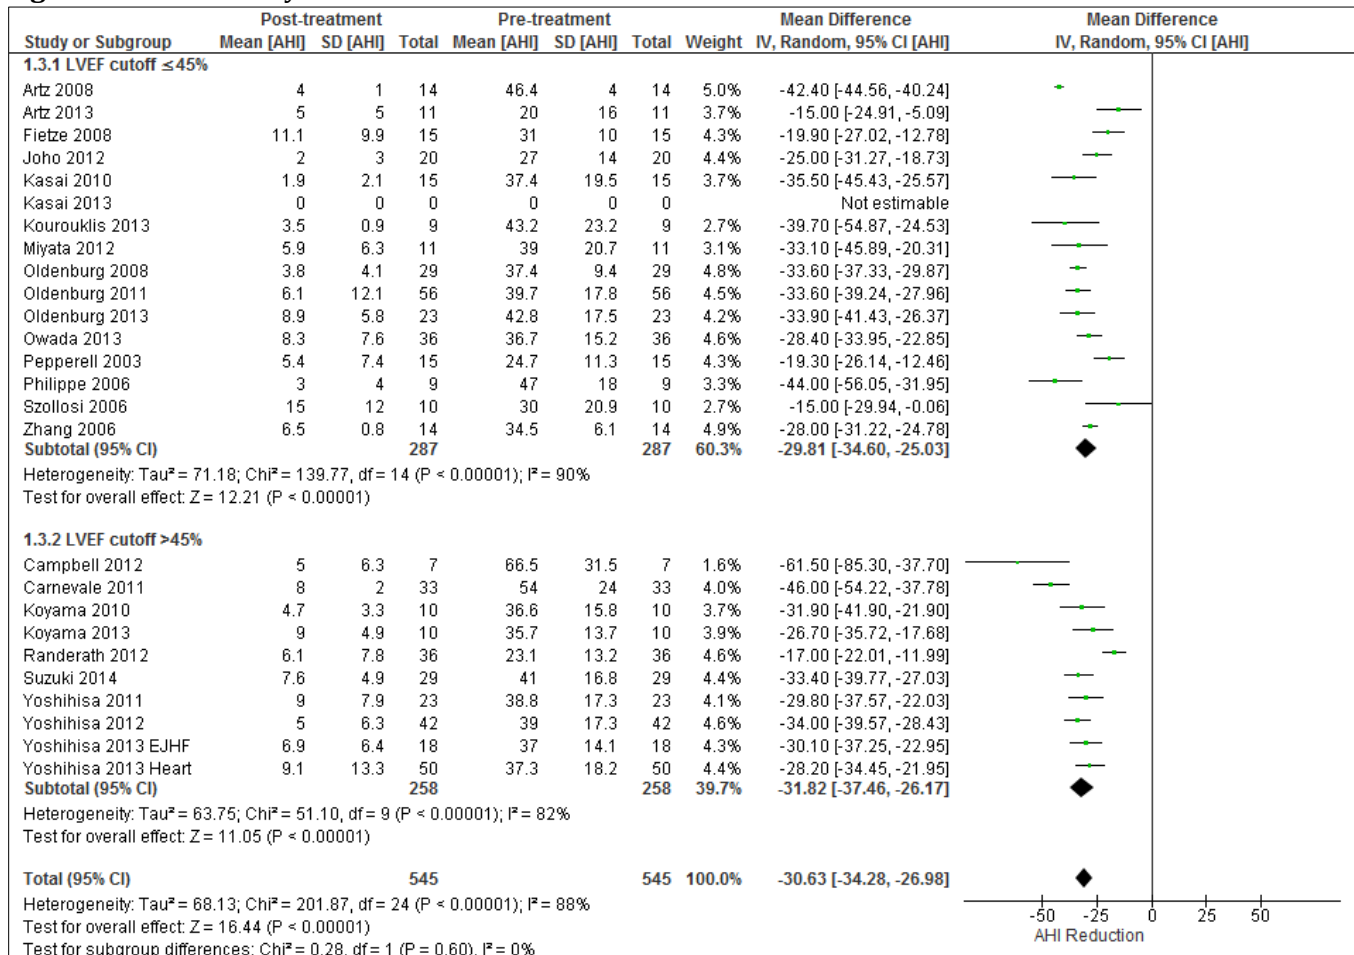

**Figure S3A – Risk of cardiac death after ASV treatment vs standard care (for recommendations)**

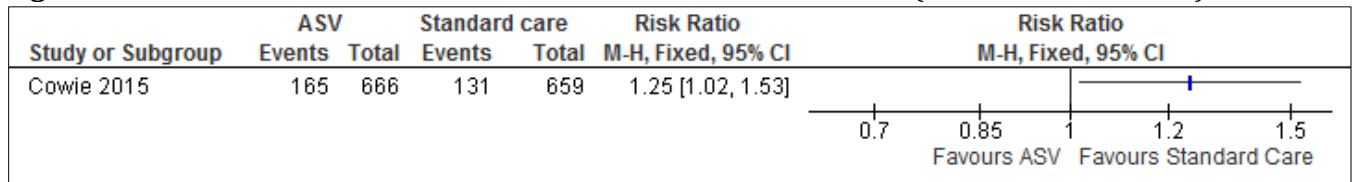

**Figure S3B – Risk of cardiac death after ASV treatment vs standard care (all studies)**

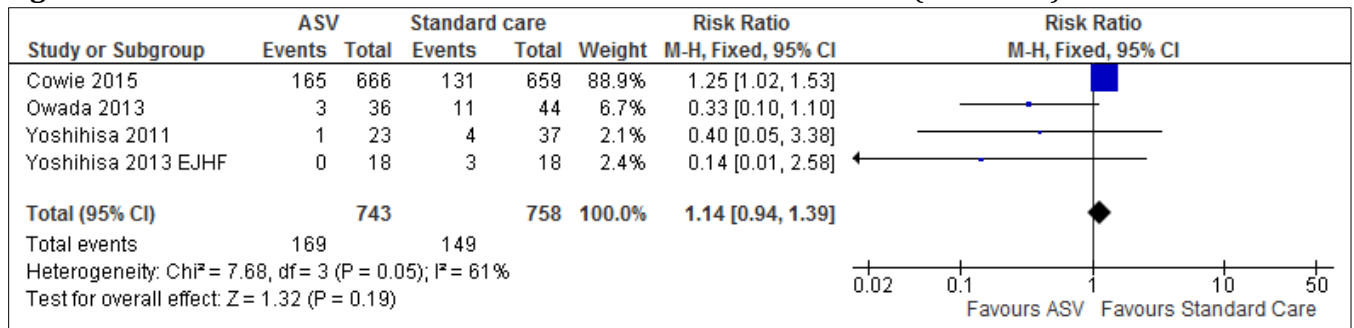

**Table S2: LVEF Data; ASV**

| Author, Yr             | Control Treatment   | Duration | n<br>(treatment/control) | Test Treatment |             | Control Treatment |            |
|------------------------|---------------------|----------|--------------------------|----------------|-------------|-------------------|------------|
|                        |                     |          |                          | Baseline       | After       | Baseline          | After      |
| Artz 2013              | Standard care       | 12 wks   | 11/10                    | 29.9 ±7.2      | 33.1 ±8.6   | 29.4 ±6.9         | 31.7 ±8.9  |
| Bitter 2013            | Standard care       | 12 wks   | 96/86                    | 32 (23, 40)    | 4.3 ±4.0    | 33 (24, 44)       | N/A        |
| Carnevale 2011         | None                | 36 mo.   | 33                       | 40.1 ±13.5     | 42.6 ±13.5* | N/A               |            |
| Fietze 2008            | BPAP-S/T            | 6 wks    | 15/15                    | 24.6 ±7.9      | 26.5 ±8.8   | 25.5 ±9.2         | 31.1 ±10.5 |
| Joho 2012              | Standard care       | ~3.5 mo. | 20/12                    | 30 ±9          | 37 ±12      | 34 ±9             | 31 ±9      |
| Kasai 2010             | CPAP                | 3 mo.    | 15/15                    | 35.7 ±12.9     | 44.8 ±12.9  | 36.0 ±8.1         | 37.9 ±N/A  |
| Kasai 2013             | CPAP                | 3 mo.    | 12/11                    | 32.0 ±7.9      | 37.8 ±9.1   | 32.9 ±5.9         | 31.9 ±6.1  |
| Koyama 2010            | Standard care       | 4 wks.   | 10/7                     | 43.5 ±6.4      | 53.3 ±6.1   | 45.7 ±9.5         | 45.6 ±9.7  |
| Koyama 2013            | Standard care       | 6 mo.    | 10/9                     | 43.8 ±10.4     | 47.0 ±10.6  | 40.6 ±15.3        | 40.2 ±14.2 |
| Miyata 2012            | Standard care       | 6 mo.    | 11/11                    | 30.5 ±13.9     | 36.0 ±11.2  | 30.2 ±9.0         | 32.2 ±8.8  |
| Oldenburg 2008         | None                | 6 mo.    | 29                       | 28.2 ±6.9      | 35.2 ±10.6  | N/A               |            |
| Oldenburg 2011         | Standard care       | ~6.5 mo. | 56/59                    | 29.9 ±6.1      | 34.0 ±8.8   | 27.8 ±7.4         | 28.1 ±8.7  |
| Owada 2013             | Standard care       | 6 mo.    | 36/44                    | 37.0 ±15.6     | 44.7 ±15.6  | 35.7 ±11.1        | 38.4 ±13.8 |
| Pepperell 2003         | Sub-therapeutic ASV | 4 wks    | 15/11                    | 36.5 ±3.0      | 38.3 ±3.3   | 35.7 ±3.9         | 36.3 ±3.8  |
| Philippe 2006          | CPAP                | 6 mo.    | 7/6                      | 29 ±9          | 36.9 ±9*    | 30 ±9             | 28 ±N/A*   |
| Randerath 2012         | CPAP                | 1 yr.    | 26/25                    | 47.4 ±15.9     | 45.5 ±16.0  | 43.2 ±16.4        | 48.1 ±11.9 |
| Suzuki 2014            | None                | 6 mo.    | 29                       | 37.8 ±16.6     | 46.6 ±14.3  | N/A               |            |
| Yoshihisa 2011         | Standard care       | 6 mo.    | 23/37                    | 38.3 ±18.4     | 46.4 ±15.4  | 38.9 ±12.9        | 41.2 ±14.7 |
| Yoshihisa 2013<br>EJHF | Standard care       | 6 mo.    | 18/18                    | 56.1 ±7.4      | 61.1 ±9.9   | 54.0 ±8.2         | 51.9 ±9.7  |
| Zhang 2006             | Oxygen              | 2 wks    | 14                       | 30.2 ±4.6      | 37.2 ±4.1   | N/A               | 33.2 ±5.1  |

\*estimated from graph

**Table S3: AHI Data; ASV**

| Author, Yr           | Control Treatment   | Duration | n<br>(treatment /control) | Test Treatment          |                        | Control Treatment       |                         |
|----------------------|---------------------|----------|---------------------------|-------------------------|------------------------|-------------------------|-------------------------|
|                      |                     |          |                           | Baseline                | After                  | Baseline                | After                   |
| Arzt 2008            | CPAP                | 1 night  | 14                        | 46.4 ±4                 | 4 ±1                   | 46.4 ±4                 | 22 ±4                   |
| Arzt 2013            | Standard care       | 12 wks.  | 11/10                     | 20 ±16                  | 5 ±5                   | 19 ±15                  | 20±15                   |
| Bitter 2013          | Standard care       | 12 wks   | 96/86                     | 25 (25,30)*             | ~27.5±N/A              | 26 (24,32)*             | ~25±N/A                 |
| Campbell 2012        | Oxygen              | 8 wks.   | 7                         | 66.5 ±31.5              | 5.0 ±6.3               | N/A                     | 19.4 ±15.7              |
| Carnevale 2011       | Standard care       | 36 mo.   | 33                        | 54.0 ±24.0              | 8 ±2 <sup>†</sup>      | N/A                     | N/A                     |
| Cowie 2015           | Standard care       | 31 mo.   | 666/659                   | 31.2 ±12.7              | 33(00,365)*            | 31.7±13.2               | N/A                     |
| Fietze 2008          | BPAP-S/T            | 6 wks.   | 15/15                     | 31.0 ±10.0 <sup>‡</sup> | 11.1 ±9.9 <sup>‡</sup> | 33.4 ±20.5 <sup>‡</sup> | 16.1 ±16.2 <sup>‡</sup> |
| Joho 2012            | Standard care       | ~3.5 mo. | 20/12                     | 27 ±14                  | 2 ±3                   | 22 ±7                   | 23 ±3                   |
| Kasai 2010           | CPAP                | 3 mo.    | 15/15                     | 37.4 ±19.5              | 1.9 ±2.1               | 38.6 ±13.9              | 15.4 ±12.8              |
| Kasai 2013           | CPAP                | 3 mo.    | 12/11                     | 25.0 ±6.9               | 2.0 ±1.4               | 23.0 ±7.9               | 23.1 ±9.1               |
| Kourouklis 2013      | None                | 6 mo.    | 9                         | 43.2 ±23.2              | 3.5 ±0.9               | N/A                     |                         |
| Koyama 2010          | Standard care       | 4 wks.   | 10/7                      | 36.6 ±15.8              | 4.7 ±3.3               | 33.1 ±16.8              | 33.9 ±21.7              |
| Koyama 2013          | Standard care       | 6 mo.    | 10/9                      | 35.7 ±13.7              | 9.0 ±4.9               | 39.9 ±8.9               | 37.2 ±9.7               |
| Miyata 2012          | Standard care       | 6 mo.    | 11/11                     | 39.0 ±20.7              | 5.9 ±6.3               | 33.0 ±17.8              | N/A                     |
| Morgenthaler 2007    | CPAP                | 1 night  | 6                         | 46.0 ±22.7              | 0 ±0                   | N/A                     | 22.8 ±18.2              |
|                      | BPAP-S/T            | 1 night  | 6                         | 46.0 ±22.7              | 0 ±0                   | N/A                     | 1.5 ±1.5                |
| Oldenburg 2008       | None                | 6 mo.    | 29                        | 37.4 ±9.4               | 3.8 ±4.1               | N/A                     |                         |
| Oldenburg 2011       | Standard care       | ~6.5 mo. | 56/59                     | 39.7 ±17.8              | 6.1 ±12.1              | 36.6 ±13.2              | N/A                     |
| Oldenburg 2013       | None                | 3.6 mo.  | 23                        | 42.8 ±17.5              | 8.9 ±5.8               | N/A                     |                         |
| Owada 2013           | Standard care       | 6 mo.    | 36/44                     | 36.7 ±15.2              | 8.3 ±7.6               | 32.9 ±16.3              | 28.0 ±14.3              |
| Pepperell 2003       | Sub-therapeutic ASV | 4 wks.   | 15/11                     | 24.7 ±11.3              | 5.4 ±7.4               | 23.3 ±13.3              | 14.7 ±10.6              |
| Philippe 2006        | CPAP                | 6 mo.    | 9/8                       | 47 ±18                  | 3 ±4 <sup>†</sup>      | 40.5 ±13.5              | 21 ±25 <sup>†</sup>     |
| Randerath 2012       | CPAP                | 1 yr.    | 36/34                     | 23.1 ±13.2              | 6.1 ±7.8               | 21.8 ±11.7              | 10.7 ±8.7               |
| Suzuki 2014          | None                | 6 mo.    | 29                        | 41.0 ±16.8              | 7.6 ±4.9               | N/A                     |                         |
| Szollosi 2006        | None                | 1 night  | 10/0                      | 30.0 ±20.9              | 14.0 ±12.0             | N/A                     |                         |
| Yoshihisa 2011       | Standard care       | 6 mo.    | 23/37                     | 38.8 ±17.3              | 9.0 ±7.9               | N/A                     | N/A                     |
| Yoshihisa 2012       | Oxygen              | 1 night  | 42                        | 39.0 ±17.3              | 5.0 ±6.3               | N/A                     | 22.3 ±13.4              |
| Yoshihisa 2013 EJHF  | Standard care       | 6 mo.    | 18/18                     | 37.0 ±14.1              | 6.9 ±6.4               | 35.4 ±15.5              | 27.8 ±15.0              |
| Yoshihisa 2013 Heart | None                | 1 night  | 50                        | 37.3 ±18.2              | 9.1 ±13.3              | N/A                     |                         |
| Zhang 2006           | Oxygen              | 2 wks    | 14/14                     | 34.5 ±6.1               | 6.5 ±0.8               | N/A                     | 27.8 ±8.2               |

\* data presented as median (quartiles)

<sup>†</sup> estimated from graph<sup>‡</sup> CSRI = CSAI+PBI (periodic breathing index)**Table S4: Mortality (Cardiac Death) Data; ASV**

| Author, Yr          | Control Treatment | Duration | Test Treatment |     | Control Treatment |     |
|---------------------|-------------------|----------|----------------|-----|-------------------|-----|
|                     |                   |          | Events         | N   | Events            | N   |
| Cowie 2015          | Standard care     | 31 mo.   | 165            | 666 | 131               | 659 |
| Owada 2013          | Standard care     | 6 mo.    | 3              | 36  | 11                | 44  |
| Suzuki 2014         | Standard care     | 6 mo.    | 1              | 23  | 4                 | 37  |
| Yoshihisa 2013 EJHF | Standard care     | 6 mo.    | 0              | 18  | 3                 | 18  |
